# Supplementary material for: Conservation Genomic Analyses of African and Asiatic Cheetahs (Acinonyx jubatus) Across Their Current and Historical Species Range
Source: bioRxiv or medRxiv preprint supplement (doi:10.1101/2020.02.14.949081), 2020-03-31
Supplement: Supplementary file [file media-2.pdf]

### Replicate 1

#### Major modes:

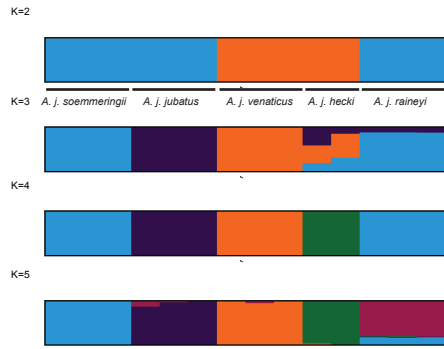

#### Minor modes:

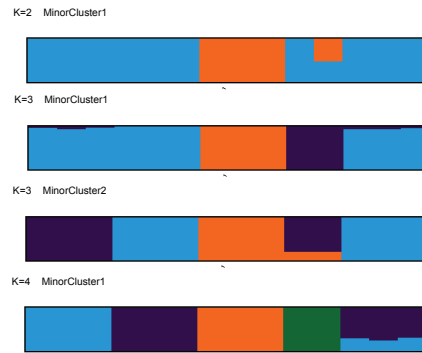

#### Cluster Frequencies:

K=2 30/50, 19/50  
 K=3 27/50, 16/50, 5/50  
 K=4 25/50, 14/50  
 K=5 50/50

### Replicate 2

#### Major modes:

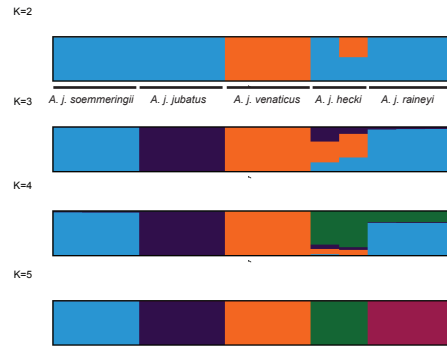

#### Minor modes:

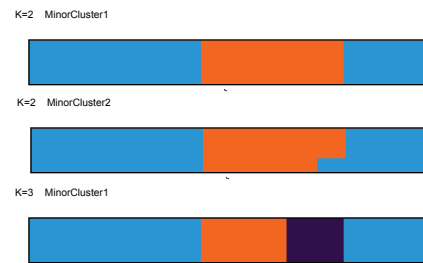

#### Cluster Frequencies:

K=2 20/50, 18/50, 12/50  
 K=3 25/50, 20/50  
 K=4 50/50  
 K=5 43/50

### Replicate 3

#### Major modes:

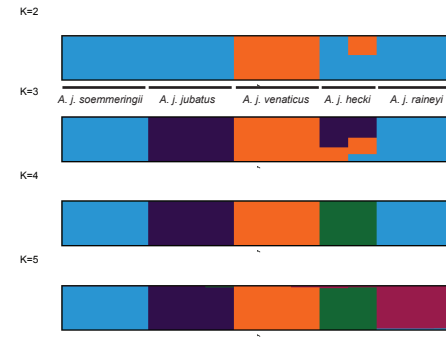

#### Minor modes:

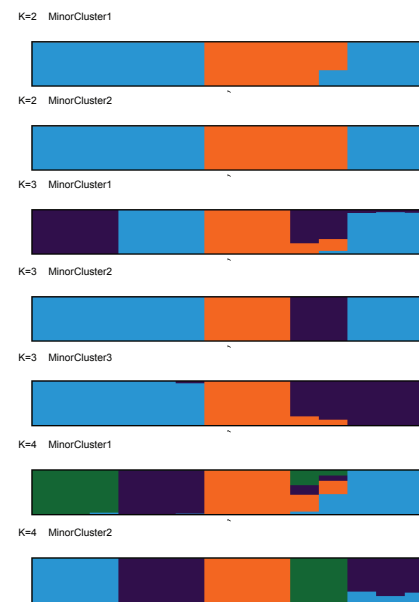

#### Cluster Frequencies:

K=2 19/50, 18/50, 13/50  
 K=3 19/50, 17/50, 9/50, 5/50  
 K=4 18/50, 18/50, 13/50  
 K=5 50/50
