# Supplementary material for: Conservation Genomic Analyses of African and Asiatic Cheetahs (Acinonyx jubatus) Across Their Current and Historical Species Range
Source: bioRxiv or medRxiv preprint supplement (doi:10.1101/2020.02.14.949081), 2020-03-31
Supplement: Supplementary file [file media-3.pdf]

## Major modes:

K=2

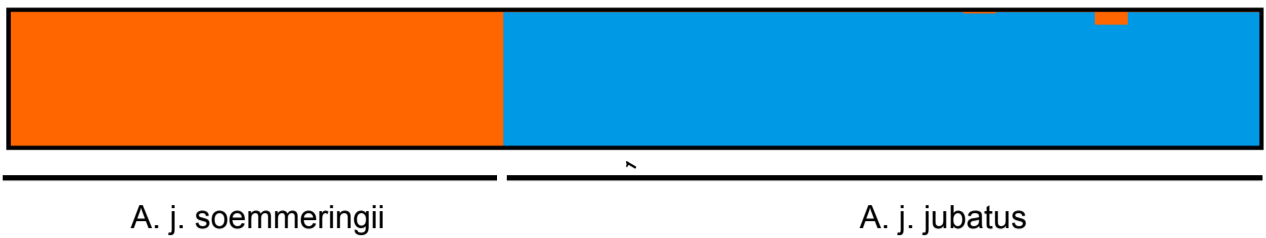

K=3

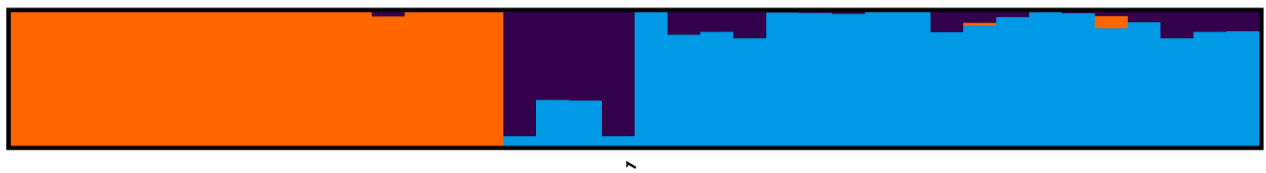

K=4

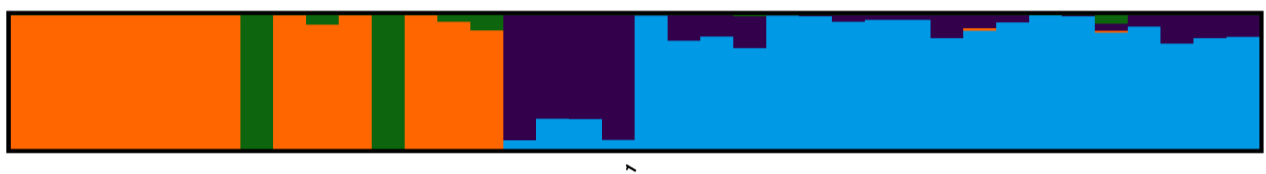

K=5

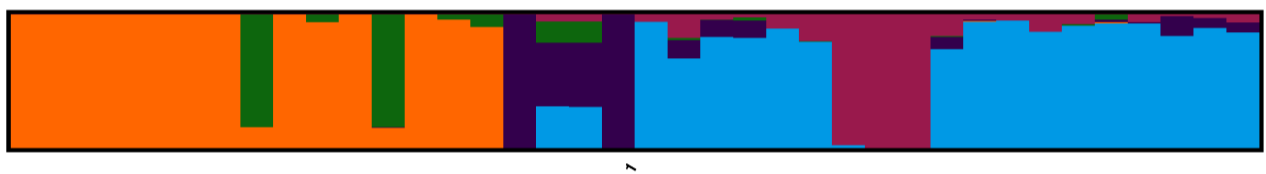

## Minor modes:

K=3 MinorCluster1

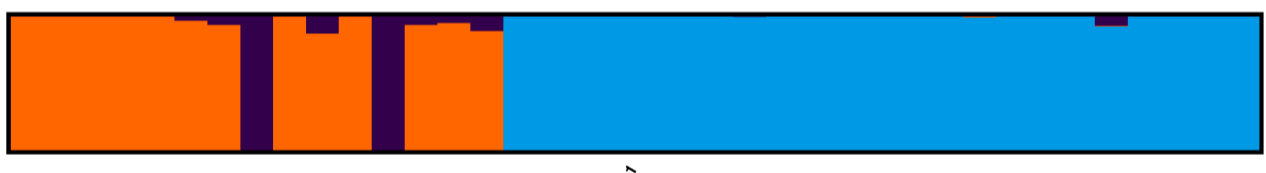

K=4 MinorCluster1

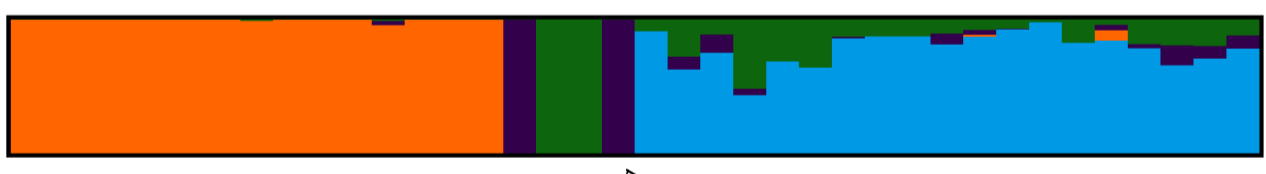

K=5 MinorCluster1

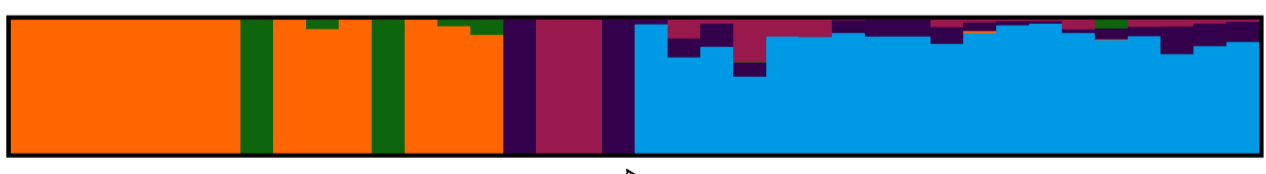

K=5 MinorCluster2

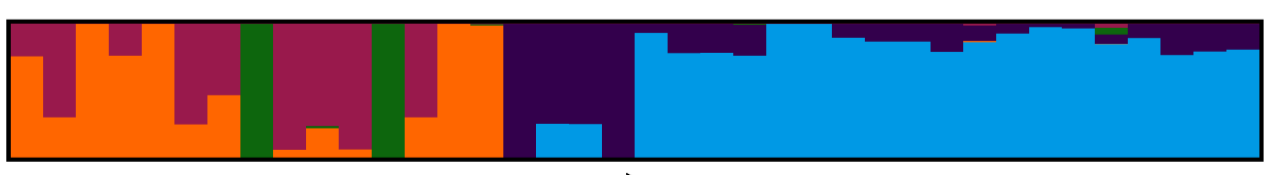

## Cluster Frequencies:

K=2 50/50  
K=3 27/50, 16/50  
K=4 29/50, 8/50  
K=5 19/50, 16/50, 15/50
