# Supplementary material for: Conservation Genomic Analyses of African and Asiatic Cheetahs (Acinonyx jubatus) Across Their Current and Historical Species Range
Source: bioRxiv or medRxiv preprint supplement (doi:10.1101/2020.02.14.949081), 2020-03-31

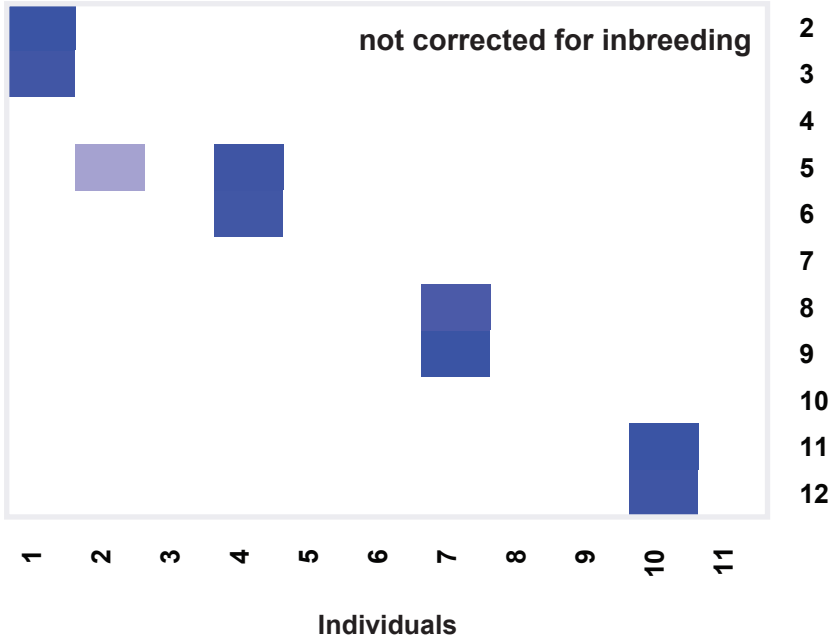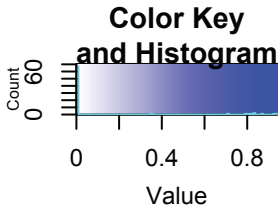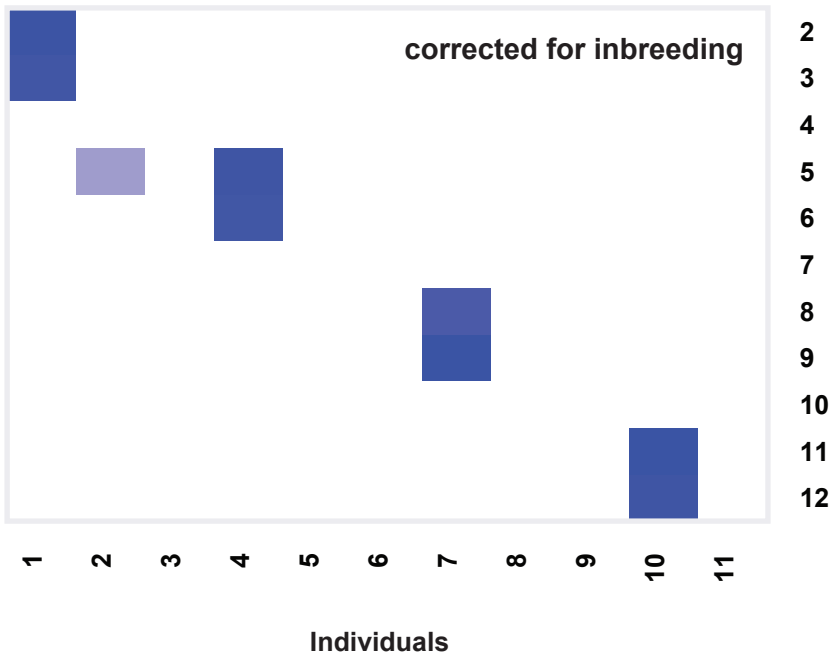

Supplement: Supplementary file [file media-6.pdf]
